# Supplementary material for: The level of origin firing inversely affects the rate of replication fork progression
Source: PubMed Central journal article supplement — J Cell Biol. 2013 Apr 29;201(3):373–83. doi: 10.1083/jcb.201208060 (PMC3639389; doi:10.1083/jcb.201208060), 2013-04-29
Supplement: supp_jcb.201208060_JCB_201208060_sm.pdf [file supp_jcb.201208060_JCB_201208060_sm.pdf]

Zhong et al., <http://www.jcb.org/cgi/content/full/jcb.201208060/DC1>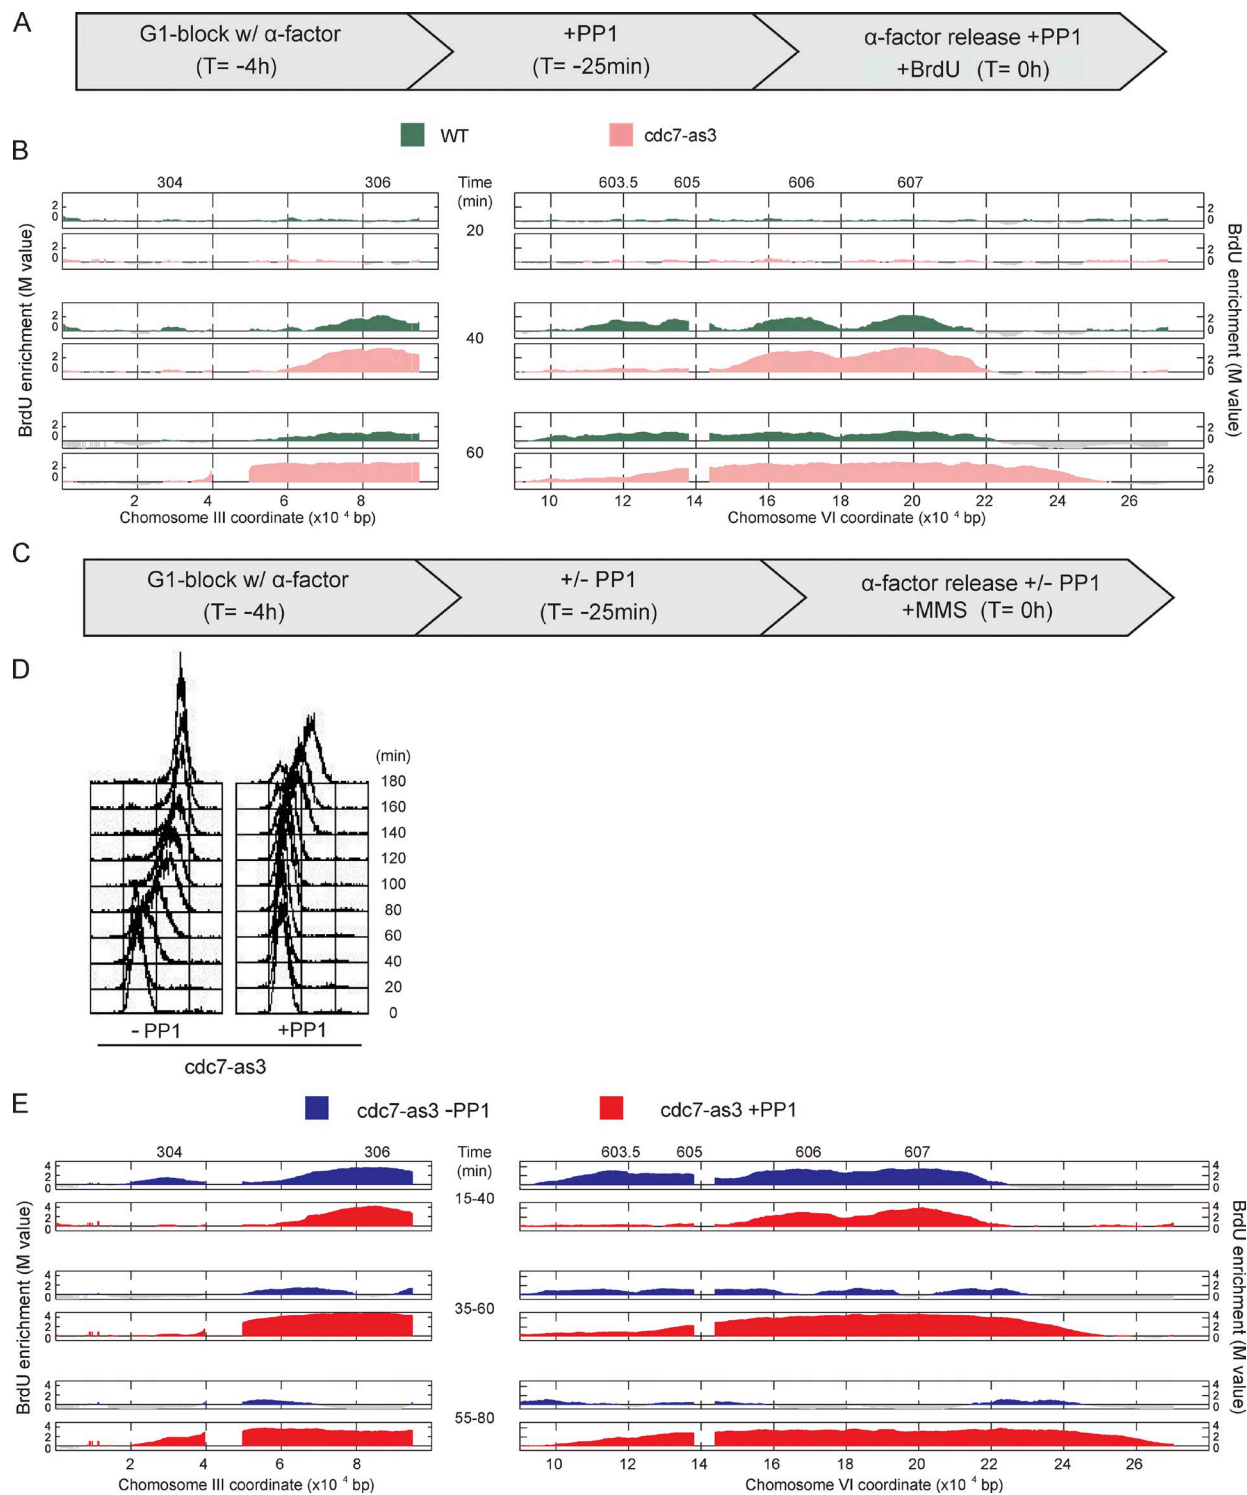

**Figure S1. Cdc7 function regulates replication fork progression.** (A) Experimental scheme: WT and *cdc7-as3* cells were synchronized in G1 phase with  $\alpha$ -factor for 4 h, treated with PP1 25 min before release, and released from  $\alpha$ -factor in the presence of PP1 and 400  $\mu$ g/ml BrdU. (B) Aliquots of the cultures were harvested for analysis by BrdU-IP-chip at the indicated times. (C) Experimental scheme: *cdc7-as3* cells were synchronized in G1 phase with  $\alpha$ -factor for 4 h, treated or not treated with PP1 25 min before release, and released from  $\alpha$ -factor in the presence or absence of PP1 and presence of 0.033% MMS. (D) Samples were withdrawn at the indicated times for DNA content analysis by FACScan. (E) Aliquots of the cultures were pulsed with BrdU for the indicated intervals and harvested for analysis by BrdU-IP-chip. Data shown are from a single representative experiment out of two replicates, except the -PP1 sample in E, which was performed once.

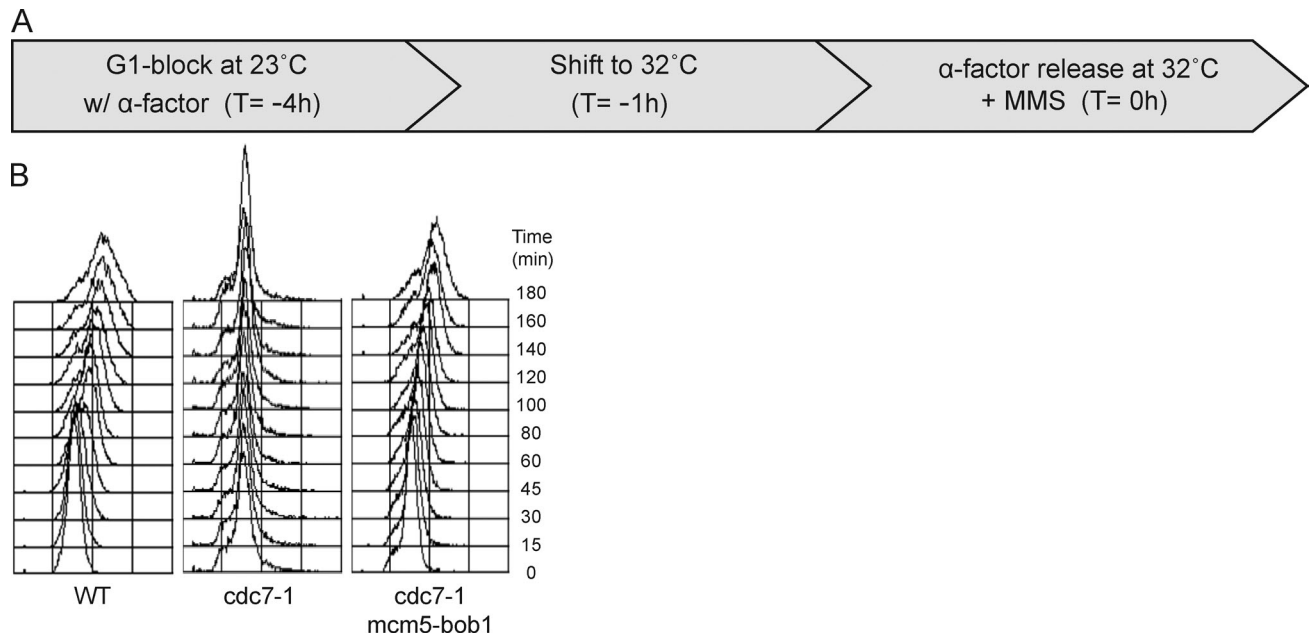

Figure S2. **Effective depletion of Cdc7 function with the *cdc7-1* allele.** (A) Experimental scheme: WT, *cdc7-1*, and *cdc7-1 mcm5-bob1* cells were synchronized in G1 phase with  $\alpha$ -factor for 3 h at 23°C, shifted to 32°C for 1 h, and released from  $\alpha$ -factor at 32°C into the presence of 0.033% MMS. (B) Samples were withdrawn at the indicated times for DNA content analysis by FACSscan. Data shown are from a single representative experiment out of two replicates.

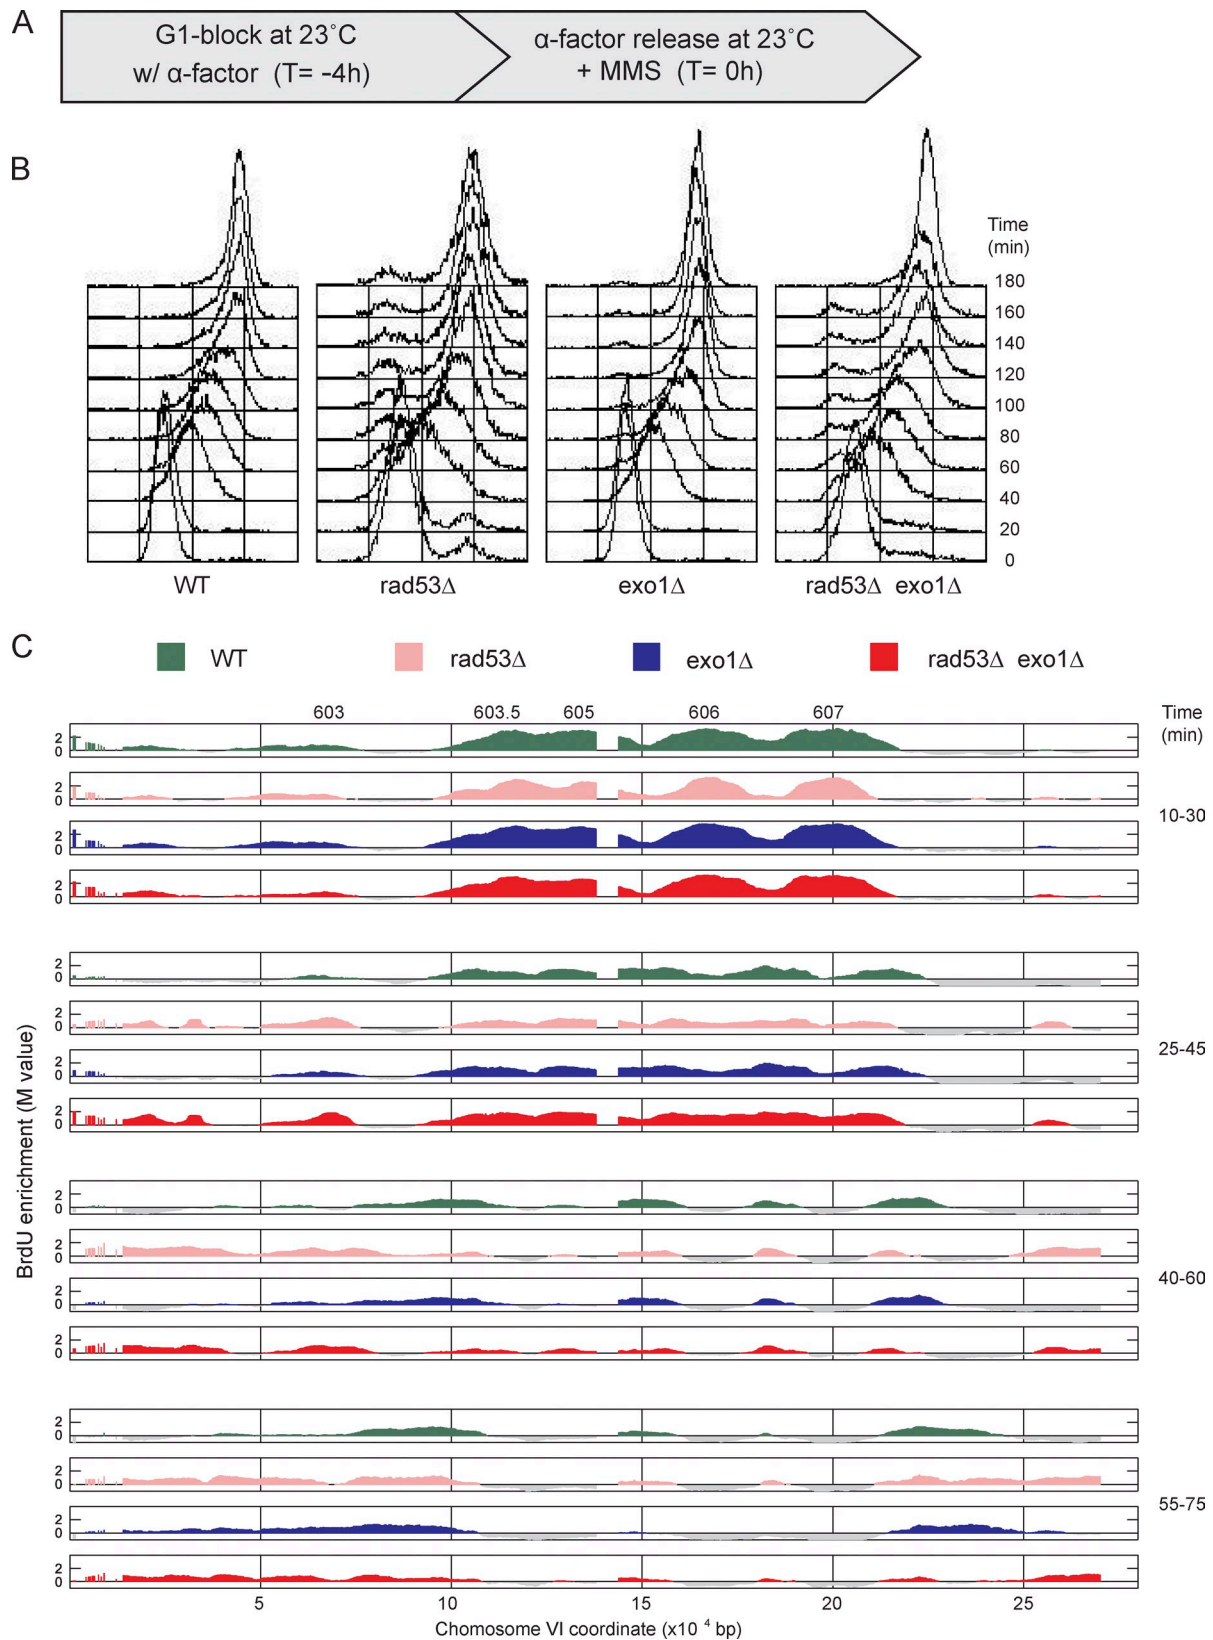

Figure S3. **Deregulated origin firing in *rad53* $\Delta$  slows replication forks.** (A) Experimental scheme: WT, *rad53* $\Delta$ , *exo1* $\Delta$ , and *rad53* $\Delta$  *exo1* $\Delta$  cells (all strains are *sm11* $\Delta$ ) were synchronized in G1 phase with  $\alpha$ -factor for 4 h at 23°C and released from  $\alpha$ -factor at 23°C into the presence of 0.033% MMS. (B) Samples were withdrawn at the indicated times for DNA content analysis by FACSscan. (C) Aliquots of the cultures were pulsed with BrdU for the indicated intervals and harvested for analysis by BrdU-IP-chip. Data shown are from a single experiment.

Table S1. Summary of data for fork rate and origin firing estimation

| Strain + condition    | Experiment ID | Time point used to calculate number of origins firing | Time point used to calculate color for heat maps | Number of origins fired | Time points used for calculating fork rate | Fork rate            |
|-----------------------|---------------|-------------------------------------------------------|--------------------------------------------------|-------------------------|--------------------------------------------|----------------------|
| WT – MMS              | cdc7as3-setA  | 1 + 2                                                 | 1 + 2                                            | 233                     | 1, 2, and 3                                | <i>bp/min</i><br>587 |
| cdc7as3 – MMS         | cdc7as3-setA  | 1 + 2                                                 | 1 + 2                                            | 156                     | 2 and 3                                    | 1,378                |
| WT                    | cdc7as3-setA  | 1 + 2                                                 | 1 + 2                                            | 223                     | 1, 2, 3, and 4                             | 478                  |
| cdc7as3               | cdc7as3-setA  | 1 + 2                                                 | 1 + 2                                            | 152                     | 1, 2, 3, and 4                             | 1,048                |
| WT – MMS              | cdc7as3-setB  | 1 + 2                                                 | 1 + 2                                            | 234                     | 1 and 2                                    | 199                  |
| cdc7as3 – MMS         | cdc7as3-setB  | 1 + 2                                                 | 1 + 2                                            | 157                     | 1, 2, and 3                                | 1,051                |
| WT                    | cdc7as3-setB  | 1 + 2                                                 | 1 + 2                                            | 214                     | 1, 2, 3, and 4                             | 414                  |
| cdc7as3               | cdc7as3-setB  | 1 + 2                                                 | 1 + 2                                            | 125                     | 1, 2, and 3                                | 1,014                |
| WT                    | cdc7-1-setA   | 1                                                     | 1 + 2                                            | 238                     | 1, 2, 3, and 4                             | 533                  |
| cdc7-1/mcm5-bob1      | cdc7-1-setA   | 1                                                     | 1 + 2                                            | 178                     | 1 and 2                                    | 1,214                |
| cdc7-1/mcm5-bob1 pph3 | cdc7-1-setA   | 1                                                     | 1 + 2                                            | 176                     | 1, 2, and 3                                | 973                  |
| WT                    | cdc7-1-setB   | ND                                                    | ND                                               | ND                      | 1, 2, 3, and 4                             | 549                  |
| cdc7-1/mcm5-bob1      | cdc7-1-setB   | ND                                                    | ND                                               | ND                      | 1 and 2                                    | 1,514                |
| WT                    | cdc7-1-setC   | 1                                                     | 1 + 2                                            | 253                     | ND                                         | ND                   |
| cdc7-1/mcm5-bob1      | cdc7-1-setC   | 1                                                     | 1 + 2                                            | 179                     | ND                                         | ND                   |
| cdc7-1/mcm5-bob1 pph3 | cdc7-1-setC   | 1                                                     | 1 + 2                                            | 161                     | ND                                         | ND                   |
| WT                    | orc1-setA     | 1 + 2                                                 | 1 + 2                                            | 224                     | 1, 2, 3, and 4                             | 580                  |
| orc1-161              | orc1-setA     | 1 + 2                                                 | 1 + 2                                            | 183                     | 1 and 2                                    | 1,171                |
| WT                    | orc1-setB     | 1 + 2                                                 | 1 + 2                                            | 236                     | 1, 2, 3, and 4                             | 883                  |
| orc1-161              | orc1-setB     | 1 + 2                                                 | 1 + 2                                            | 201                     | 1 and 2                                    | 1,232                |
| WT                    | mec1-setA     | 1 + 2                                                 | 1 + 2                                            | 205                     | 2, 3, and 4                                | 454                  |
| mec1                  | mec1-setA     | 1 + 2                                                 | 1 + 2                                            | 301                     | 2, 3, and 4                                | 250                  |
| WT                    | mec1-setB     | 1 + 2                                                 | 1 + 2                                            | 232                     | 1, 2, 3, and 4                             | 579                  |
| mec1                  | mec1-setB     | 1 + 2                                                 | 1 + 2                                            | 318                     | 1, 2, and 3                                | 233                  |
